# Supplementary material for: Foraging areas, offshore habitat use, and colony overlap by incubating Leach’s storm-petrels Oceanodroma leucorhoa in the Northwest Atlantic
Source: PLoS One. 2018 May 9;13(5):e0194389. doi: 10.1371/journal.pone.0194389 (PMC5942770; doi:10.1371/journal.pone.0194389)
Supplement: S2 Dataset — (XLSX) [file pone.0194389.s002.xlsx]

## Sheet: incubation
Year	Colony	Individual	Trip_number	Trip_duration_days	Foraging_range_km	Cumulative_distance_km
2013	Baccalieu	115176887	1	4	727	1741
2013	Baccalieu	115176887	2	4	645	1557
2013	Baccalieu	115176887	3	3	529	1323
2013	Baccalieu	115176890	1	4	769	1661
2013	Baccalieu	115176890	2	4	868	1902
2013	Baccalieu	115178885	1	3	741	1700
2013	Baccalieu	115178885	2	3	742	1762
2013	Baccalieu	115178885	3	6	790	2419
2013	Baccalieu	115188024	1	4	676	1694
2013	Baccalieu	115188024	2	4	729	1565
2013	Baccalieu	115188054	1	4	765	1631
2013	Baccalieu	115188054	2	4	825	2112
2013	Baccalieu	115188055	1	3	817	1705
2013	Baccalieu	115188055	2	4	815	1807
2013	Gull	115176835	1	3	617	1350
2013	Gull	115176835	2	4	1040	2767
2013	Gull	115176835	3	4	841	1976
2013	Gull	115176835	4	3	795	2033
2013	Gull	115176837	1	4	849	1744
2013	Gull	115176837	2	4	1123	2981
2013	Gull	115176837	3	4	1024	2492
2013	Gull	115176837	4	4	1412	3002
2013	Gull	115176837	5	4	1285	2910
2013	Gull	115176842	1	4	736	2076
2013	Gull	115176842	2	4	636	1532
2013	Gull	115176842	3	5	694	1705
2013	Gull	115176842	4	4	651	1797
2013	Gull	115176843	1	5	1007	2084
2013	Gull	115176843	2	4	727	1616
2013	Gull	115176843	3	4	913	1950
2013	Gull	115176845	1	4	850	1997
2013	Gull	115176845	2	3	470	988
2013	Gull	115176845	3	4	708	2016
2013	Gull	115176845	4	4	912	1958
2013	Gull	115176876	1	4	980	2137
2013	Gull	115176876	2	3	696	1630
2013	Gull	115176876	3	4	934	2052
2013	Gull	115176876	4	4	835	2114
2013	Gull	115176877	1	4	687	1805
2013	Gull	115176877	2	4	642	1491
2013	Gull	115176877	3	4	731	1584
2013	Gull	115176877	4	4	762	1656
2014	Baccalieu	115188170	1	4	865	2124
2014	Baccalieu	115188170	2	4	814	1787
2014	Baccalieu	115188170	3	4	727	1572
2014	Baccalieu	115188171	1	4	598	1313
2014	Baccalieu	115188171	2	4	714	1634
2014	Baccalieu	115188171	3	3	378	779
2014	Baccalieu	115188171	4	4	613	1348
2014	Baccalieu	115188172	1	3	516	1171
2014	Baccalieu	115188172	2	5	754	1914
2014	Baccalieu	115188172	3	4	713	1670
2014	Baccalieu	115188173	1	3	411	958
2014	Baccalieu	115188173	2	3	410	1045
2014	Baccalieu	115188173	3	4	588	1910
2014	Baccalieu	115188175	1	5	512	1980
2014	Baccalieu	115188175	2	3	445	905
2014	Baccalieu	115188175	3	3	375	782
2014	Baccalieu	115188516	1	4	447	1129
2014	Baccalieu	115188516	2	5	739	1638
2014	Baccalieu	115188516	3	5	762	2096
2014	Baccalieu	115188517	1	6	682	1609
2014	Baccalieu	115188517	2	4	658	1413
2014	Baccalieu	115188517	3	5	903	2009
2014	Baccalieu	115188518	1	3	326	729
2014	Baccalieu	115188518	2	4	602	1476
2014	Baccalieu	115188518	3	4	690	1805
2014	Baccalieu	115188519	1	6	576	1462
2014	Baccalieu	115188519	2	4	706	1634
2014	Baccalieu	115188519	3	4	608	1322
2014	Baccalieu	115188558	1	4	523	1367
2014	Baccalieu	115188558	2	4	726	1816
2014	Baccalieu	115188560	1	3	622	1250
2014	Baccalieu	115188560	2	4	661	1581
2014	Baccalieu	115188560	3	3	582	1247
2014	Baccalieu	115188179	1	3	573	1157
2014	Baccalieu	115188179	2	4	565	1554
2014	Baccalieu	115188556	1	4	478	1314
2014	Gull	115188186	1	4	583	1469
2014	Gull	115188186	2	5	795	1966
2014	Gull	115188186	3	3	755	1768
2014	Gull	115188187	1	3	518	1280
2014	Gull	115188187	2	4	1084	2658
2014	Gull	115188187	3	4	550	1727
2014	Gull	115188189	1	4	824	1796
2014	Gull	115188189	2	4	676	1637
2014	Gull	115188189	3	4	673	1470
2014	Gull	115188192	1	3	643	1391
2014	Gull	115188192	2	3
2014	Gull	115188192	3	3	588	1330
2014	Gull	115188192	4	3	641	1589
2014	Gull	115188193	1	4	850	2376
2014	Gull	115188193	2	3	836	1997
2014	Gull	115188193	3	4	721	1718
2014	Gull	115188194	1	3	872	2067
2014	Gull	115188194	2	1
2014	Gull	115188194	3	4	842	2101
2014	Gull	115188194	4	5	818	1912
2014	Gull	115188194	5	3	788	1693
2014	Gull	115188195	1	3	530	1262
2014	Gull	115188195	2	3	581	1327
2014	Gull	115188195	3	3	734	1600
2014	Gull	115188195	4	3	733	1517
2014	Gull	115188196	1	4	902	2131
2014	Gull	115188196	2	4	1234	2758
2014	Gull	115188196	3	5	828	2060
2014	Gull	115188197	1	4	838	1925
2014	Gull	115188197	2	4	713	1976
2014	Gull	115188197	3	4	689	1922
2014	Gull	115188198	1	4	744	1848
2014	Gull	115188198	2	4	636	1362
2014	Gull	115188198	3	4	721	1806
2014	Gull	115188511	1	3	644	1359
2014	Gull	115188511	2	4	524	1243
2014	Gull	115188511	3	3	620	1340
2014	Gull	115188512	1	3	454	960
2014	Gull	115188512	2	4	830	1735
2014	Gull	115188512	3	4	728	1679
2014	Gull	115188513	1	3	367	870
2014	Gull	115188513	2	3	385	1007
2014	Gull	115188513	3	4	584	1379
2014	Gull	115188514	1	4	756	1622
2014	Gull	115188514	2	5	746	1587
2014	Gull	115188514	3	4	744	1612
2014	Gull	115188515	1	4	658	1714
2014	Gull	115188515	2	4	705	1495
2014	Gull	115188515	3	4	664	1483
2014	Gull	115188526	1	3	489	1017
2014	Gull	115188526	2	5	512	1210
2014	Gull	115188526	3	4	621	1339
2014	Middle Lawn	115188529	1	4	981	2513
2014	Middle Lawn	115188529	2	4	856	2039
2014	Middle Lawn	115188529	3	4	1063	2417
2014	Middle Lawn	115188530	1	4	910	2349
2014	Middle Lawn	115188530	2	4	710	1869
2014	Middle Lawn	115188530	3	4	759	1642
2014	Middle Lawn	115188532	1	5	958	2293
2014	Middle Lawn	115188532	2	2	382	768
2014	Middle Lawn	115188532	3	4	951	2139
2014	Middle Lawn	115188533	1	5	814	2088
2014	Middle Lawn	115188533	2	5	778	2037
2014	Middle Lawn	115188533	3	3	478	1024
2014	Middle Lawn	115188537	1	5	905	2105
2014	Middle Lawn	115188537	2	4	761	1826
2014	Middle Lawn	115188537	3	5	887	2182
2014	Middle Lawn	115188540	1	4	438	1091
2014	Middle Lawn	115188540	2	4	442	1165
2014	Middle Lawn	115188540	3	3	368	908
2014	Middle Lawn	115188543	1	4	758	1902
2014	Middle Lawn	115188543	2	4	554	1154
2014	Middle Lawn	115188543	3	2	164	329
2014	Middle Lawn	115188547	1	4	642	1977
2014	Middle Lawn	115188547	2	3
2014	Middle Lawn	115188547	3	3	157	532
2014	Middle Lawn	115188547	4	3	72	234
2014	Middle Lawn	115188547	5	2	84	204
2014	Middle Lawn	115188542	1	4	777	1664
2014	Middle Lawn	115188542	2	4	625	1417
2014	Middle Lawn	115188542	3	4	504	1093
2014	Middle Lawn	115188542	4	3	301	715
2014	Middle Lawn	115188542	5	3	383	1032
2013	Country	260102647	1	4	462	1213
2013	Country	260102647	2	8	708	2297
2013	Country	260102658	1	4	877	1874
2013	Country	260102658	2	6	790	1983
2013	Country	260102659	1	4	280	691
2013	Country	260102659	2	6	921	2516
2013	Country	260102661	1	5	852	1956
2013	Country	260102661	2	5	974	2042
2013	Country	260102663	1	5	1033	2594
2013	Country	260102663	2	6	1183	3490
2013	Country	260102665	1	5	821	2354
2013	Country	260102665	2	4	906	2018
2013	Country	790102448	1	6	991	2199
2013	Country	790102448	2	5	606	1725
2013	Country	790102466	1	4	820	1829
2013	Country	790102466	2	7	1060	2628
2013	Country	790102491	1	5	1074	2348
2013	Country	790102491	2	3	644	1368
2013	Bird	260102724	1	4	1107	2413
2013	Bird	260102724	2	4	1203	2538
2013	Bird	260102724	3	3
2013	Bird	260102724	4	3
2013	Bird	260102701	1	4	958	2037
2013	Bird	260102701	2	4	904	1969
2013	Bird	260102701	3	3	672	1608
2013	Bird	260102702	1	4	896	2350
2013	Bird	260102702	2	4	1041	2887
2013	Bird	260102702	3	3	584	1641
2013	Bird	260102702	4	4	664	1918
2013	Bird	260102703	1	3	559	1135
2013	Bird	260102703	2	4	282	784
2013	Bird	260102703	3	5	413	1190
2013	Bird	260102704	1	4	790	1648
2013	Bird	260102705	1	4	1090	2222
2013	Bird	260102705	2	4	1076	2666
2013	Bird	260102705	3	3	1182	2560
2013	Bird	260102705	4	2
2013	Bird	260102706	1	6	1013	2370
2013	Bird	260102706	2	6	993	2775
2013	Bird	260102706	3	4	710	1676
2013	Bird	260102713	1	5	336	932
2013	Bird	260102713	2	5	402	1135
2013	Bird	260102713	3	4	407	956
2013	Bird	260102713	4	4	650	1508
2013	Bird	260102713	5	3	469	1228
2013	Bird	260102716	1	5	878	1970
2013	Bird	260102716	2	4	598	1360
2013	Bird	260102721	1	3	649	1531
2013	Bird	260102721	2	4	466	1314
2013	Bird	260102721	3	3	343	819
2013	Bird	260102721	4	5	510	1346
2013	Bird	260102722	1	3	717	1448
2013	Bird	260102722	2	5	793	2115
2013	Bird	260102722	3	4	544	1437
2013	Bon Portage	2393	1	6	617	1522
2013	Bon Portage	2393	2	3	479	1022
2013	Bon Portage	2393	3	1
2013	Bon Portage	260102422	1	5	318	735
2013	Bon Portage	260102422	2	4	486	1185
2013	Bon Portage	260102445	1	5	578	1354
2013	Bon Portage	260102445	2	1
2013	Bon Portage	260102445	3	4	603	1651
2013	Bon Portage	260102445	4	2	454	920
2013	Bon Portage	260102493	1	5	822	1933
2013	Bon Portage	260102493	2	3	368	785
2013	Bon Portage	260102493	3	4	393	926
2013	Bon Portage	260102751	1	5	515	1418
2013	Bon Portage	260102751	2	4	529	1524
2013	Bon Portage	260102752	1	6	518	1642
2013	Bon Portage	260102752	2	3	585	1289
2013	Bon Portage	260102752	3	2	305	666
2013	Bon Portage	260102754	1	5	312	887
2013	Bon Portage	260102755	1	6	1070	2924
2013	Bon Portage	260102755	2	3	745	1761
2013	Bon Portage	260102755	3	3	579	1383
2013	Bon Portage	260102757	1	5	542	1170
2013	Bon Portage	260102757	2	3	528	1112
2013	Bon Portage	260102757	3	4	640	1559
2013	Bon Portage	790100829	1	4	379	894
2013	Bon Portage	790100829	2	4	627	1422
2013	Bon Portage	790100829	3	4	539	1245
2013	Bon Portage	790101898	1	4	428	908
2013	Bon Portage	790101898	2	4	473	1160
2013	Bon Portage	790102164	1	5	848	1864
2013	Bon Portage	790102164	2	4	602	1411
2013	Bon Portage	790102164	3	2	279	592
2013	Bon Portage	790102174	1	5	495	1259
2013	Bon Portage	790102174	2	5	464	1100
2013	Bon Portage	790102244	1	6	357	1549
2013	Bon Portage	790102244	2	4	422	968
2013	Bon Portage	790102244	3	2	291	579
2013	Bon Portage	790102244	4	6	640	2327
2014	Bon Portage	260102083	1	4	430	1079
2014	Bon Portage	260102083	2	5	453	1362
2014	Bon Portage	260102083	3	3	473	973
2014	Bon Portage	260102083	4	3	536	1135
2014	Bon Portage	260102094	1	3	359	744
2014	Bon Portage	260102094	2	2	68	159
2014	Bon Portage	260102114	1	4	195	452
2014	Bon Portage	260102114	2	1
2014	Bon Portage	260102122	1	7	582	1791
2014	Bon Portage	260102122	2	5	325	832
2014	Bon Portage	260102125	1	3	459	942
2014	Bon Portage	260102125	2	4	710	1709
2014	Bon Portage	260102439	1	5	515	1352
2014	Bon Portage	260102439	2	4	502	1224
2014	Bon Portage	260102442	1	3	376	827
2014	Bon Portage	260102442	2	2	224	448
2014	Bon Portage	260102587	1	4	363	957
2014	Bon Portage	260102587	2	3	241	555
2014	Bon Portage	260102587	3	1
2014	Bon Portage	260102617	1	3	504	841
2014	Bon Portage	260102617	2	4	506	820
2014	Bon Portage	260102617	3	2	135	292
2014	Bon Portage	260102754	1	3	550	1192
2014	Bon Portage	260102754	2	2	452	900
2014	Bon Portage	260102760	1	7	225	650
2014	Bon Portage	260102760	2	4	159	465
2014	Bon Portage	260102819	1	4	490	1061
2014	Bon Portage	260102819	2	4	527	1223
2014	Bon Portage	260102842	1	3	421	905
2014	Bon Portage	260102842	2	2	452	993
2014	Bon Portage	260102842	3	2	405	851
2014	Bon Portage	260102911	1	5	546	1229
2014	Bon Portage	260102911	2	3	431	1079
2014	Bon Portage	260102911	3	2	365	738
2014	Bon Portage	260102911	4	2	257	546
2014	Bon Portage	790100829	1	5	797	1732
2014	Bon Portage	790100829	2	4	470	1010
2014	Bon Portage	790100829	3	4	464	1077
2014	Bon Portage	790101729	1	4	388	865
2013	Kent	127184137	1	7	480	1837
2013	Kent	127184137	2	6	475	1668
2013	Kent	127184137	3	5	395	866
2013	Kent	140179840	1	4	304	810
2013	Kent	140179840	2	7	417	1543
2013	Kent	140179840	3	5	400	887
2013	Kent	140179840	4	4	330	872
2013	Kent	140180425	1	4	387	1000
2013	Kent	140180425	2	5	320	839
2013	Kent	140180425	3	4	99	404
2013	Kent	140180425	4	4	334	1041
2013	Kent	140180425	5	3	112	276
2013	Kent	140181879	1	4	321	798
2013	Kent	140181879	2	6	198	822
2013	Kent	140181879	3	6	389	1122
2013	Kent	140181879	4	5	418	990
2013	Kent	140181955	1	4	489	1171
2013	Kent	140181955	2	6	375	1056
2013	Kent	140181955	3	4	472	1001
2013	Kent	140181955	4	5	510	1246
2013	Kent	790110523	1	10	362	1304
2013	Kent	790110523	2	8	566	1441
2013	Kent	790110523	3	5	459	1186
2013	Kent	790110523	4	5	518	1327
2013	Kent	790111005	1	5	822	2122
2013	Kent	790111005	2	5	433	1024
2013	Kent	790111005	3	5	559	1616
2013	Kent	790111005	4	2	260	518
2013	Kent	790111056	1	4	315	961
2013	Kent	790111056	2	4	280	673
2013	Kent	790111056	3	3	440	900
2013	Kent	790111056	4	3	112	242
2013	Kent	790111056	5	2	82	163
2013	Kent	790111070	1	7	430	1137
2013	Kent	790111070	2	5	245	763
2013	Kent	790111070	3	4	207	544
2013	Kent	790111070	4	3	90	216
2013	Kent	790111074	1	5	639	1409
2013	Kent	790111074	2	7	504	1406
2013	Kent	790111074	3	4	565	1304
2013	Kent	790111074	4	3	90	226
2013	Kent	790111257	1	8	930	2787
2013	Kent	790111257	2	1
2013	Kent	790111257	3	5	433	979
2013	Kent	790111257	4	6	503	1395
2013	Kent	790111257	5	5	435	1062
2013	Kent	790111381	1	4	322	866
2013	Kent	790111381	2	7	367	975
2013	Kent	790111381	3	2	140	367
2013	Kent	790111381	4	4	106	238
2013	Kent	790118612	1	5	303	821
2013	Kent	790118612	2	6	369	1010
2013	Kent	790118612	3	3	399	897
2013	Kent	790118612	4	4	221	612
2013	Kent	790118612	5	6	325	1000
2013	Kent	790118661	1	5	743	1872
2013	Kent	790118661	2	8	731	1931
2013	Kent	790118661	3	6	652	1417
2013	Kent	790118661	4	5	614	1312
2013	Kent	790118670	1	6	385	1063
2013	Kent	790118670	2	7	706	1700
2013	Kent	790118670	3	4	436	1083
2013	Kent	790118670	4	3	391	958
2013	Kent	790118685	1	6	688	1546
2013	Kent	790118685	2	5	404	1030
2013	Kent	790118685	3	7	600	1899
2013	Kent	790118685	4	4	426	994
2013	Kent	790118900	1	4	268	713
2013	Kent	790118900	2	6	421	1405
2013	Kent	790118900	3	6	487	1184
2013	Kent	790118900	4	4	379	928
2014	Kent	140163351	1	6	667	1603
2014	Kent	140163351	2	6	633	1492
2014	Kent	140163351	3	5	666	1619
2014	Kent	140163352	1	2	66	164
2014	Kent	140163352	2	5	346	897
2014	Kent	140163352	3	3	350	747
2014	Kent	140163352	4	3	461	1102
2014	Kent	140163352	5	3	291	634
2014	Kent	140163352	6	4	501	1117
2014	Kent	140163353	1	1
2014	Kent	140163353	2	6	437	1445
2014	Kent	140163353	3	6	487	1774
2014	Kent	140163353	4	4	336	799
2014	Kent	140163451	1	7	683	1803
2014	Kent	140163451	2	5	831	1948
2014	Kent	140163451	3	1
2014	Kent	140163455	1	8	601	1653
2014	Kent	140163455	2	3	169	468
2014	Kent	140163455	3	5	416	936
2014	Kent	140163455	4	5	919	2208
2014	Kent	140180467	1	4	446	1065
2014	Kent	140180467	2	4	643	1390
2014	Kent	140180467	3	5	591	1664
2014	Kent	140180467	4	4	383	919
2014	Kent	140180467	5	1
2014	Kent	140180467	6	2	282	581
2014	Kent	790110441	1	4	514	1160
2014	Kent	790110441	2	5	660	1623
2014	Kent	790110441	3	1
2014	Kent	790110441	4	5	803	1814
2014	Kent	790110441	5	2	273	623
2014	Kent	790110527	1	5	413	1013
2014	Kent	790110527	2	7	707	1795
2014	Kent	790110527	3	4	334	784
2014	Kent	790110527	4	3	263	559
2014	Kent	790110879	1	11	655	1825
2014	Kent	790110879	2	5	379	1132
2014	Kent	790110879	3	1
2014	Kent	790110885	1	8	947	2469
2014	Kent	790110885	2	5	536	1398
2014	Kent	790111098	1	4	295	619
2014	Kent	790111098	2	5	292	806
2014	Kent	790111098	3	4	308	741
2014	Kent	790118659	1	5	430	955
2014	Kent	790118659	2	4	648	1764
2014	Kent	790118659	3	4	447	1068
2014	Kent	790118659	4	3	350	779
2014	Kent	790118666	1	5	258	659
2014	Kent	790118666	2	7	439	1211
2014	Kent	790118666	3	3	261	629
2014	Kent	790118789	1	1
2014	Kent	790118789	2	3	297	658
2014	Kent	790118789	3	4	473	1003
2014	Kent	790118789	4	6	853	2176
2014	Kent	790118789	5	1
2014	Kent	790118789	6	1
2014	Kent	790118789	7	6	407	1175
2014	Kent	790118796	1	4	247	678
2014	Kent	790118796	2	5	264	585
2014	Kent	790118796	3	1
2014	Kent	790118796	4	4	240	726
2014	Kent	790118796	5	2	114	232
